# Supplementary material
Source: PubMed Central journal article supplement (PMC1458977)
Supplement: pnas_0602109103_1.pdf [file pnas_0602109103_1.pdf]

**4 1/2 LIM**

**rlu ( $\beta$ -gal)**

---

**FHL1**

**0**

**FHL2**

**1488 +/- 370**

**FHL3**

**95 +/- 40**

**LM01**

**0**

**MLP**

**0**
