# Supplementary material
Source: PubMed Central journal article supplement (PMC1458977)

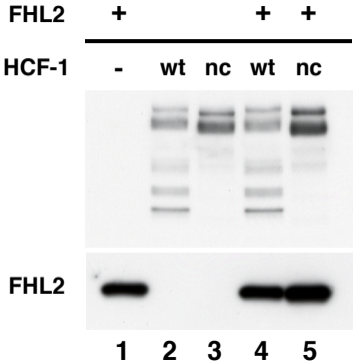

Supplement: pnas_0602109103_2.pdf [file pnas_0602109103_2.pdf]

# FHL2

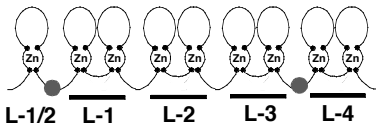

MW

64  
50  
36  
30

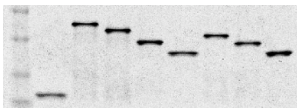

Input  
GST  
FHL2  
LIM 1-4  
LIM 2-4  
LIM 3-4  
LIM 1/2-3  
LIM 1/2-2  
LIM 2-3

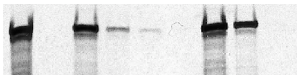

%WT

|           | %WT |
|-----------|-----|
| FHL2      | 100 |
| LIM 1-4   | 7   |
| LIM 2-4   | 2   |
| LIM 3-4   | 0   |
| LIM 1/2-3 | 160 |
| LIM 1/2-2 | 39  |
| LIM 2-3   | 0   |

Supplement: pnas_0602109103_3.pdf [file pnas_0602109103_3.pdf]
